# Supplementary material
Source: PubMed Central journal article supplement (PMC8299537)

**Supplementary information**

---

**DPP9 sequesters the C terminus of NLRP1 to repress inflammasome activation**

---

In the format provided by the authors and unedited

**Fig. 2j**

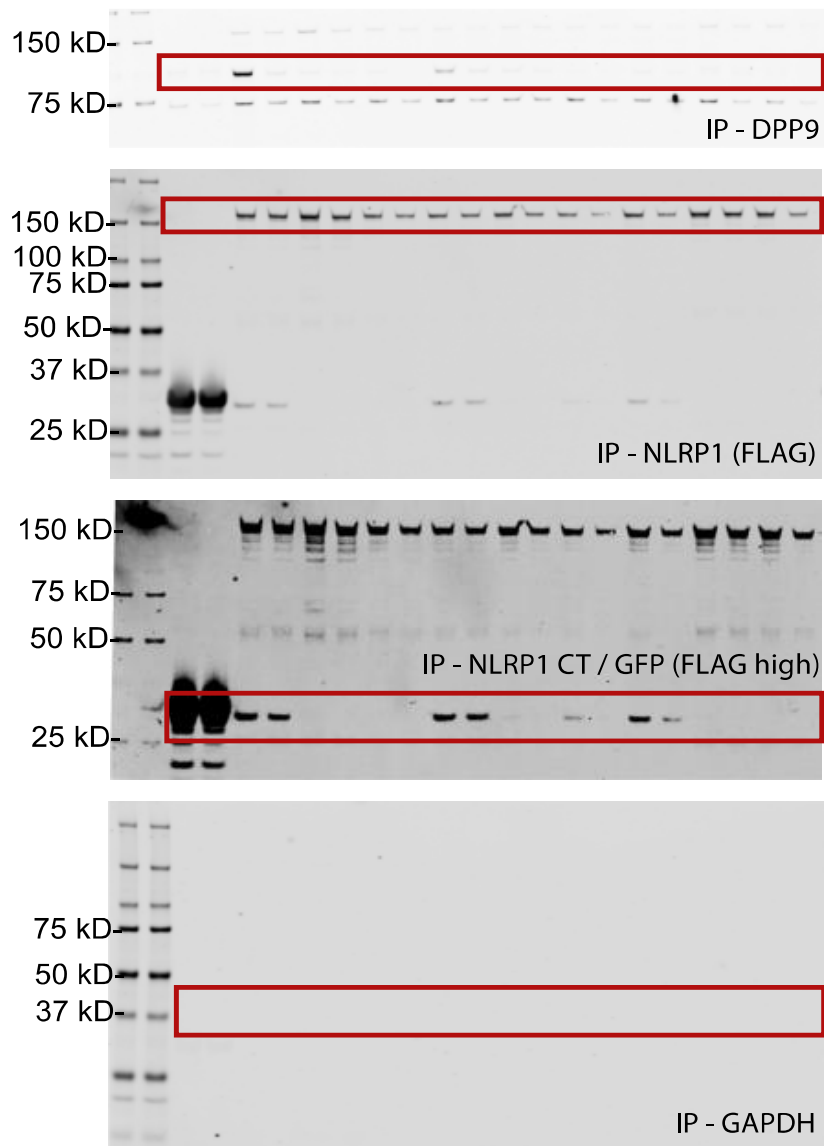

**Fig. 2k**

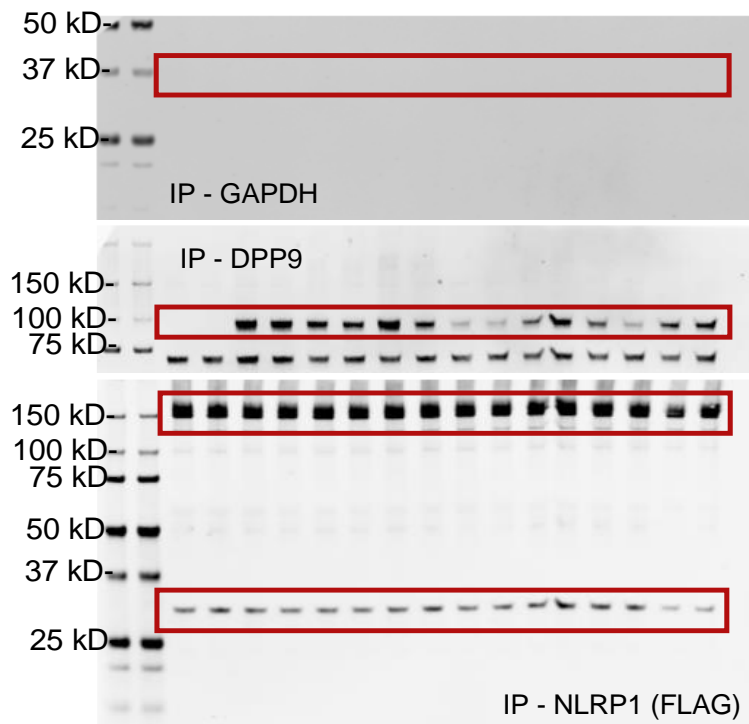

**Fig. 3a**

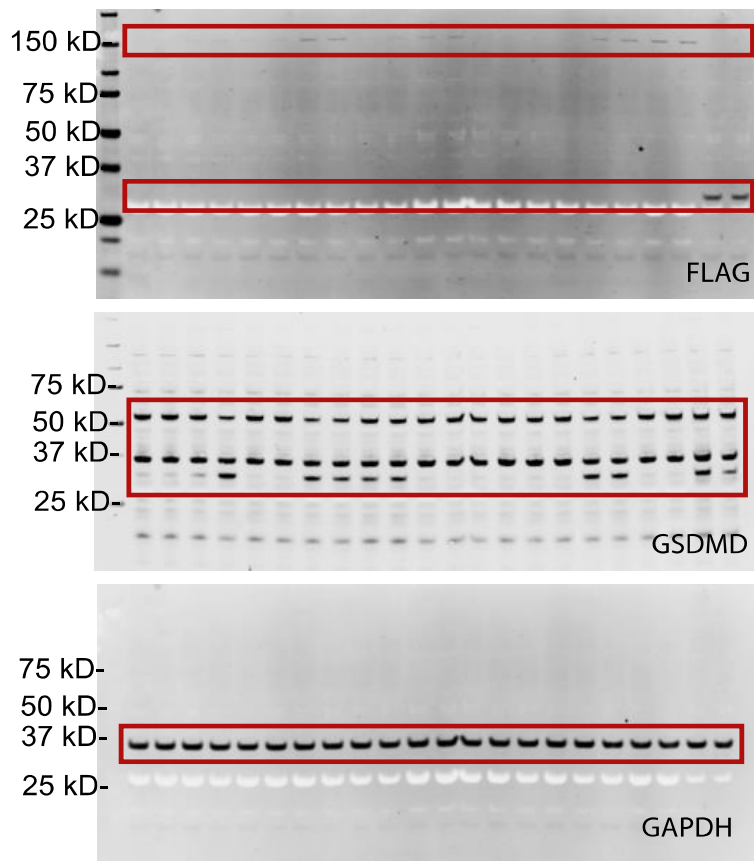

**Fig. 3c**

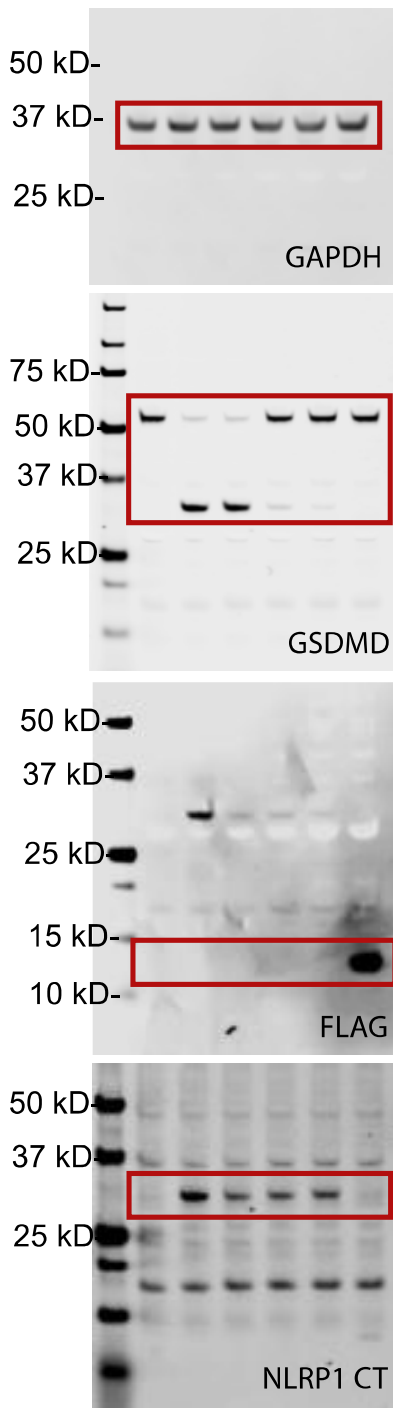

**Fig. 4b**

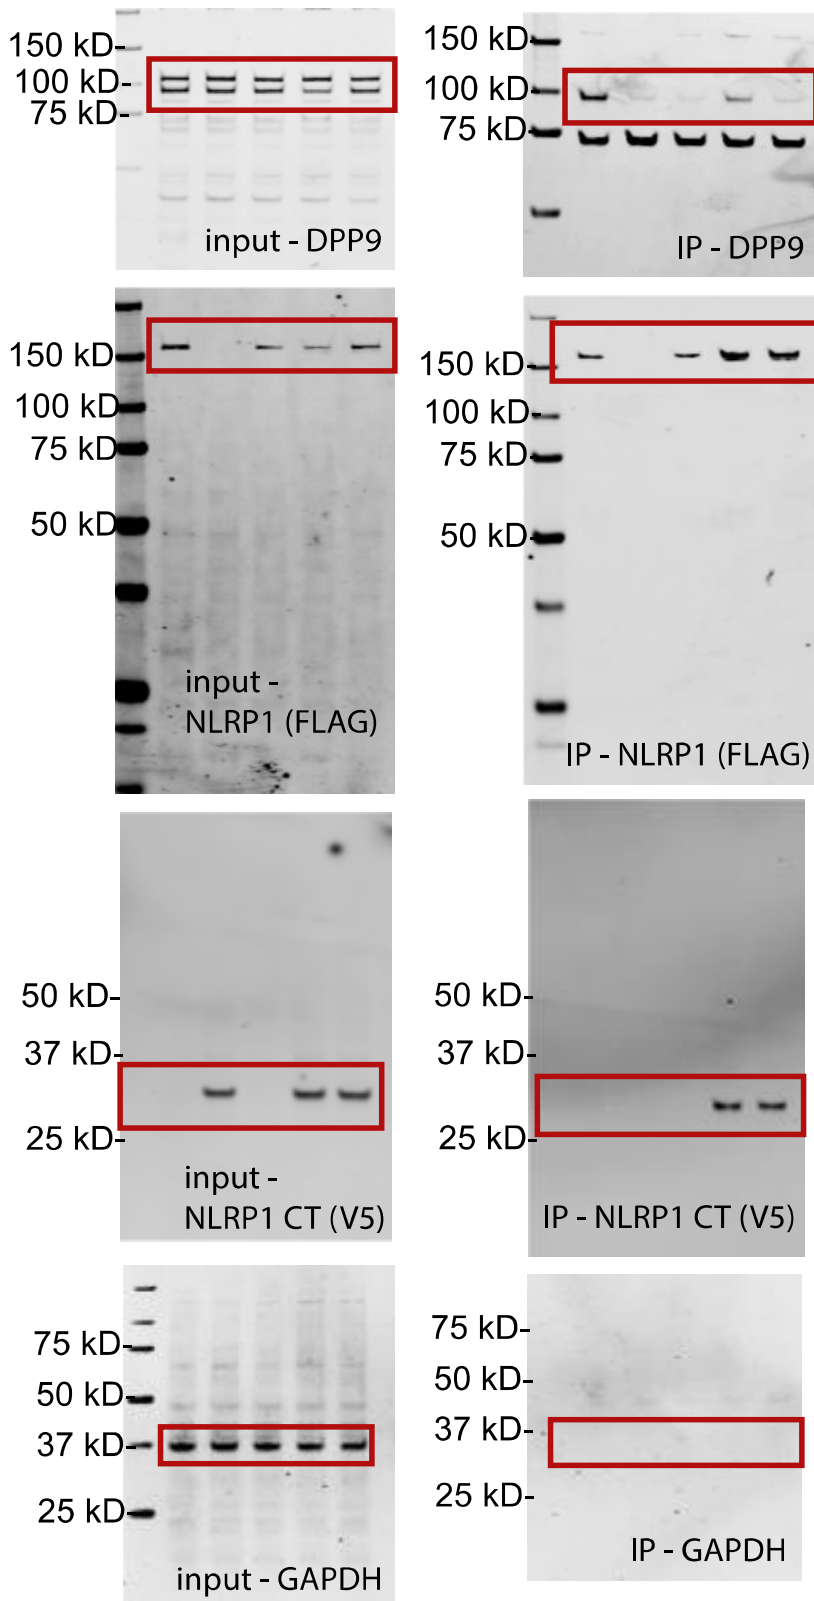

**Fig. 4c**

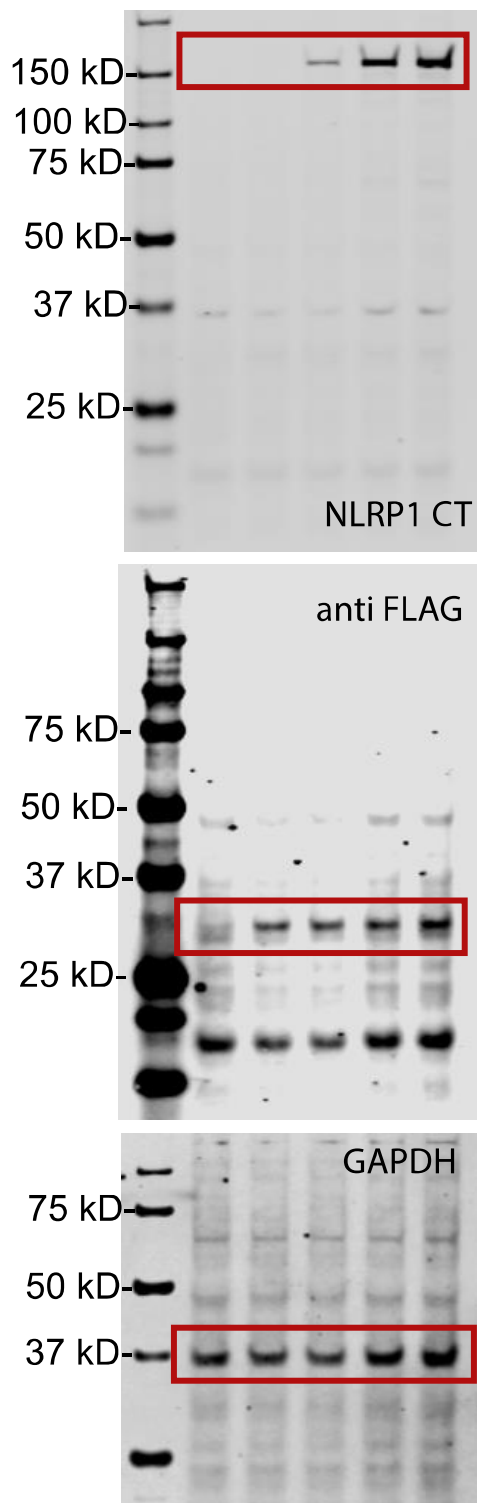

Extended Data Fig. 6b

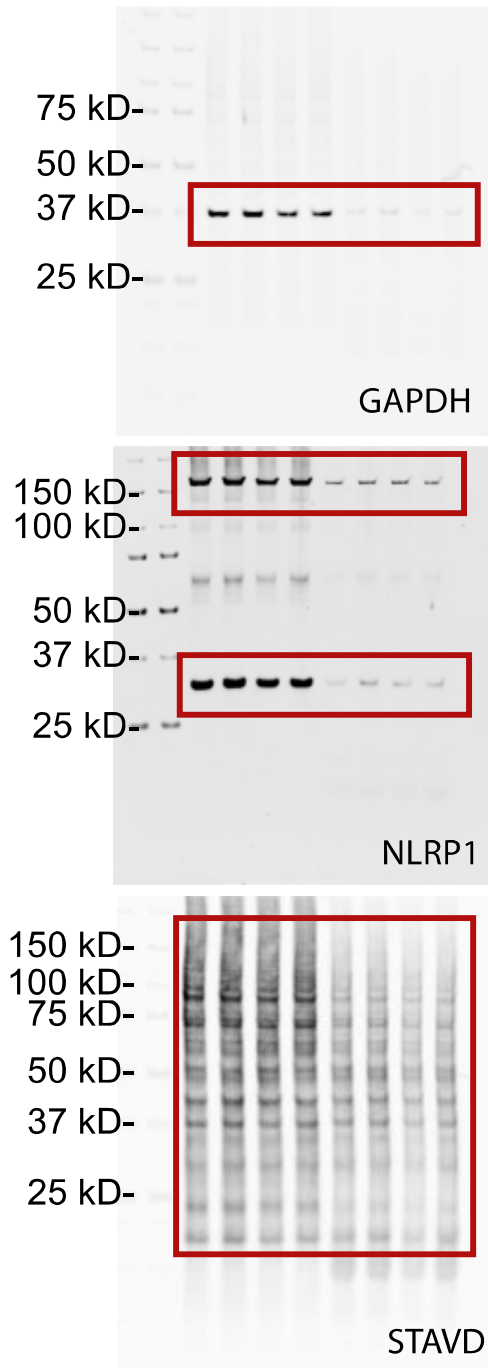

Extended Data Fig. 6e

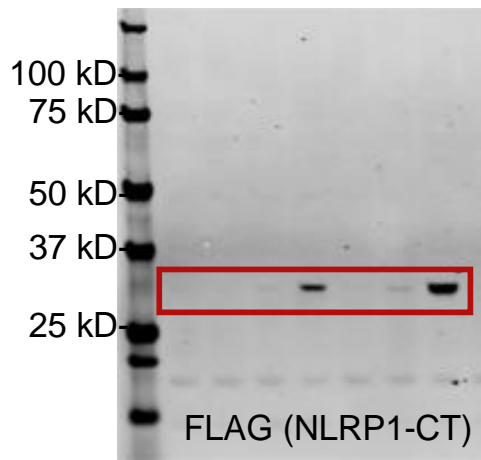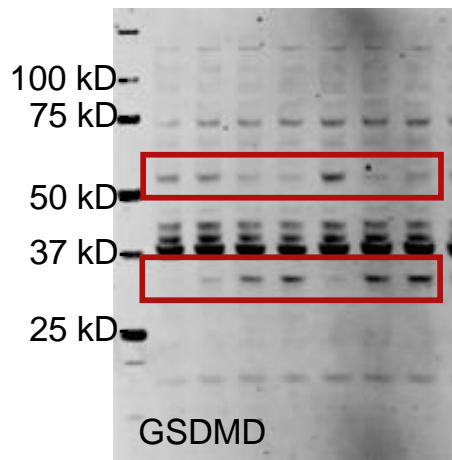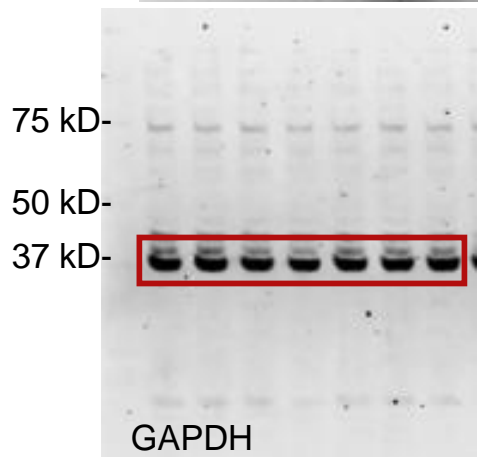



**Extended Data Fig. 7c**

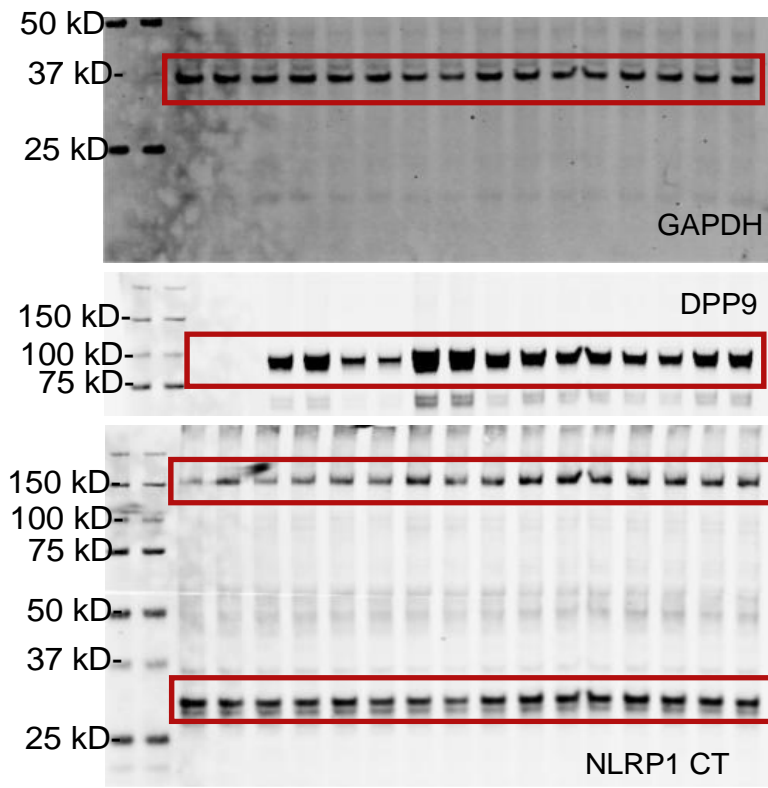

**Extended Data Fig. 7e**

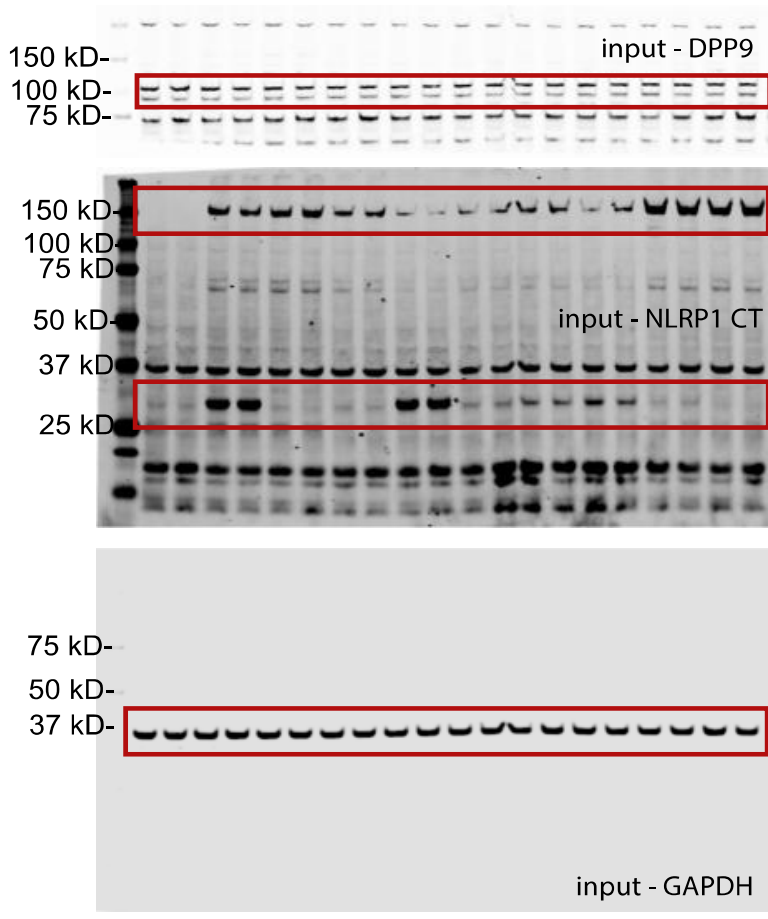

**Extended Data Fig. 9b**

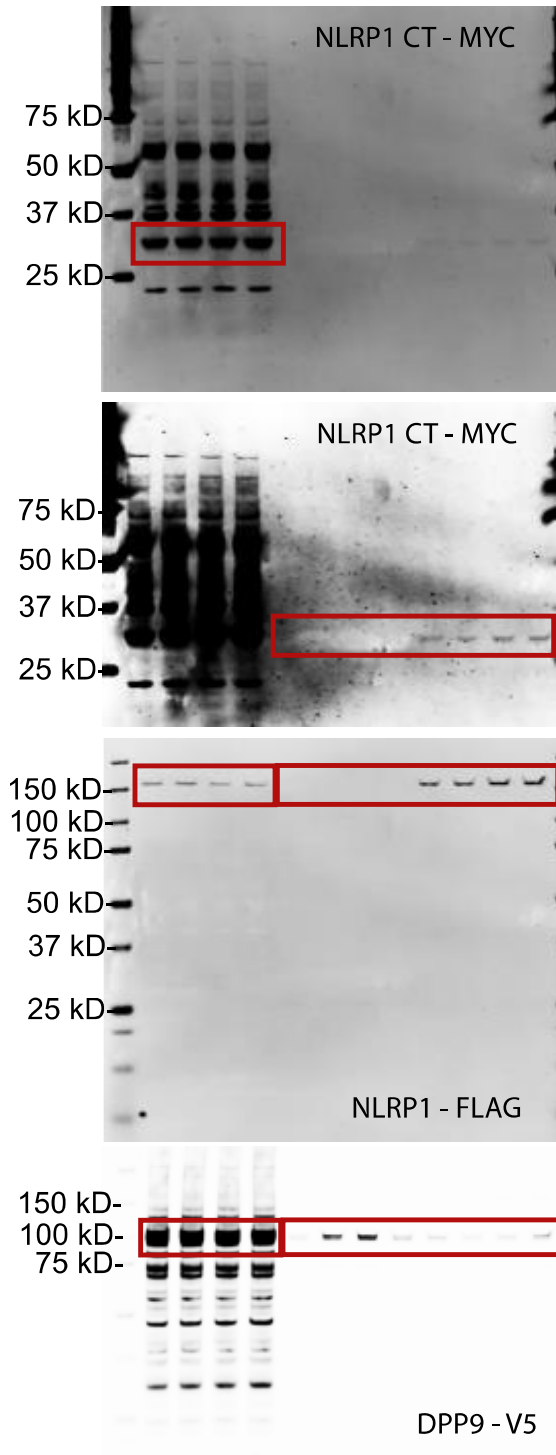

**Extended Data Fig. 9d**

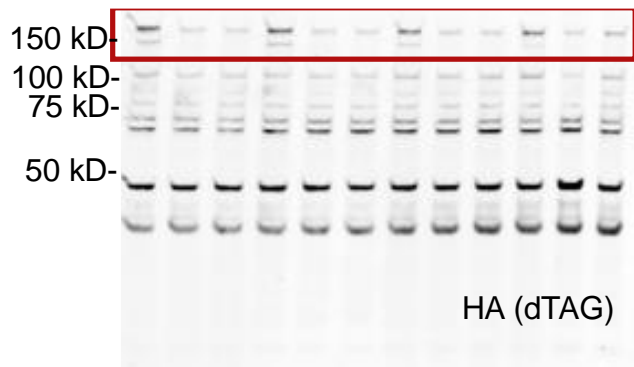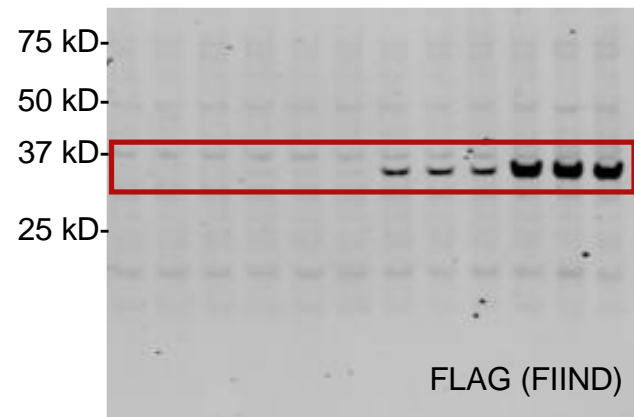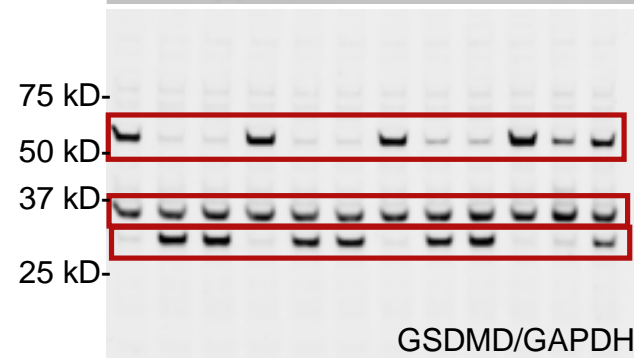

Supplement: NIHMS1720198-supplement-1720198_Supp_Info.pdf [file NIHMS1720198-supplement-1720198_Supp_Info.pdf]
